# Supplementary material for: Limitations of gene editing assessments in human preimplantation embryos
Source: PubMed Central journal article supplement (PMC9992379; doi:10.1038/s41467-023-36820-6), 2023-03-07
Supplement: 41467_2023_36820_MOESM11_ESM.pdf [file 41467_2023_36820_MOESM11_ESM.pdf]

**Title: Supplementary Data 1.**

**Description: *MYBPC3* genotypes in individual blastomeres of injected embryos.**

Large deletions (del  $\geq$  100 bp) are highlighted in red; ins represents insertion; del represents deletion; sub represents substitution.

**Title: Supplementary Data 2.**

**Description: *LDLRAP1* genotypes in blastomeres of edited and control embryos.**

Control blastomeres with LOH are highlighted in yellow.

**Title: Supplementary Data 3.**

**Description: *MYH7* genotype in individual blastomeres of control non-injected embryos.** Control blastomeres with LOH are highlighted in yellow.

**Title: Supplementary Data 4.**

**Description: *MYH7* genotype in individual blastomeres of injected embryos.**

Large deletions (del  $\geq$  100 bp) are highlighted in red; ins represents insertion; del represents deletion; sub represents substitution.

**Title: Supplementary Data 5.**

**Description: Sample-specific ADO rates in DNA after WGA.**

**Title: Supplementary Data 6.**

**Description: Locus-specific ADO rates in single cell DNA after WGA.**

**Title: Supplementary Data 7.**

**Description: Preimplantation development of CRISPR/Cas9 injected embryos.**

**Title: Supplementary Data 8.**

**Description: *MYBPC3* and *MYH7* genotypes in ESC subclones derived from edited embryos.** Cell lines with large deletions are highlighted in yellow.

**Title: Supplementary Data 9.**

**Description: Genome variants and LOH at *MYBPC3* locus in ESC clones.** Green represents homozygous regions, red represents loss of paternal variants; yellow highlighted loci represent informative genomic variants; n/a - not applicable.
